# Supplementary material for: Bax inhibitor 1 preserves mitochondrial homeostasis in acute kidney injury through promoting mitochondrial retention of PHB2
Source: Theranostics. 2020 Jan 1;10(1):384–97. doi: 10.7150/thno.40098 (PMC6929616; doi:10.7150/thno.40098)
Supplement: Supplementary file 1 — Supplementary figures and tables. [file thnov10p0384s1.pdf]

Supplemental figures and tables for  
**Bax inhibitor 1 preserves mitochondrial homeostasis in acute kidney injury through promoting  
mitochondrial retention of PHB2**

Jin Wang<sup>1\*</sup>, Pingjun Zhu<sup>1\*</sup>, Ruibing Li<sup>1</sup>, Jun Ren<sup>2,3#</sup>, Yingmei Zhang<sup>2,3#</sup>, Hao Zhou<sup>1,2#</sup>

<sup>1</sup>Chinese PLA General Hospital, Medical School of Chinese PLA, Beijing, 100853, China;

<sup>2</sup>Center for Cardiovascular Research and Alternative Medicine, University of Wyoming College  
of Health Sciences, Laramie, WY 82071 USA

<sup>3</sup>Department of Cardiology and Shanghai Institute of Cardiovascular Diseases, Zhongshan  
Hospital, Fudan University, Shanghai, China 200032

**Running title:** BI1 attenuates AKI-related mitochondrial damage

\*The first two author contributed equally to this article.

**#Correspondence to:**

**Dr. Jun Ren (E-mail: jren@uwyo.edu), Dr. Yingmei Zhang (E-mail:  
zhangym197951@126.com) or Dr. Hao Zhou (E-mail: zhouhao301@outlook.com)**  
**Center for Cardiovascular Research and Alternative Medicine, University of Wyoming**  
**College of Health Sciences, Laramie, WY 82071, USA.**  
**Tel: (307) 766-6131; Fax: (307) 766-2953**

**Supplemental Figure 1: BI1 modulates IRI-related renal damage.** **A-B.** HK2 cells were transfected with siRNA against BI1 (BI1-si) and Control siRNA (Ctrl-si). Then, western blot was used to detect the expression of BI1. **C.** Primary tubule cells were isolated from *BI1*<sup>TG</sup> and WT mice. The mimicked IRI (mIRI) model was employed through rotenone (10 mM) in glucose-free DMEM for 3-h followed by 3-h full culture medium incubation. Then, cell viability was determined using MTT assay. **D-E.** RNA was isolated from mIRI-treated cells and transcriptions of *Ccl2* and *IL-6* were used to evaluate tubule damage. Experiments were repeated for at least three times and data are shown as mean  $\pm$  SEM (n = 6 mice or 3 independent cell isolations per group). \*p<0.05.

Supplemental Figure 1

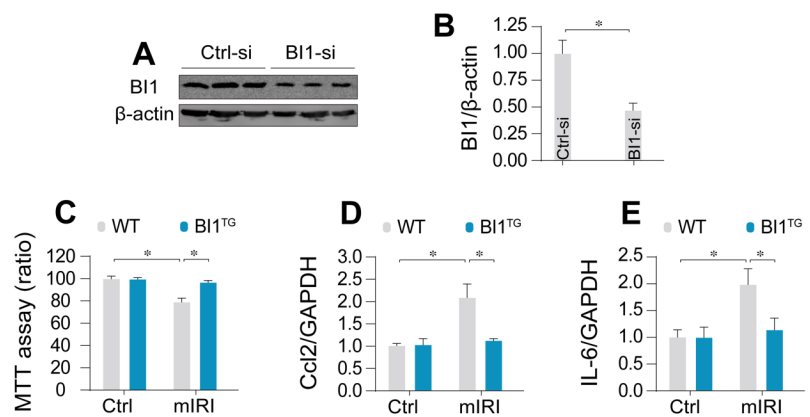

**Supplemental Figure 2: Mitochondrial homeostasis is sustained in response to BI1 overexpression under kidney IRI.** **A-B.** The transcription of mitochondrial DNA was determined via qPCR. **C-D.** ELISA was used to analyze the activity of mitochondrial respiratory complex I and II. **E-F.** *In vitro*, RNA was isolated from cells and levels of PGC1 $\alpha$  and Sirt3 were measured via qPCR. **G.** Mitochondrial morphology was observed using electron microscope. Yellow arrows demonstrated elongated mitochondrial tubules and red arrows indicated swollen mitochondria with fractured cristae. **H.** Proteins were isolated from tubule cells after *in vitro* mIRI and level of mitochondrial apoptosis was determined using Western blotting. Experiments were repeated for at least three times and data are shown as mean  $\pm$  SEM (n = 6 mice or 3 independent cell isolations per group). \* $p < 0.05$ .

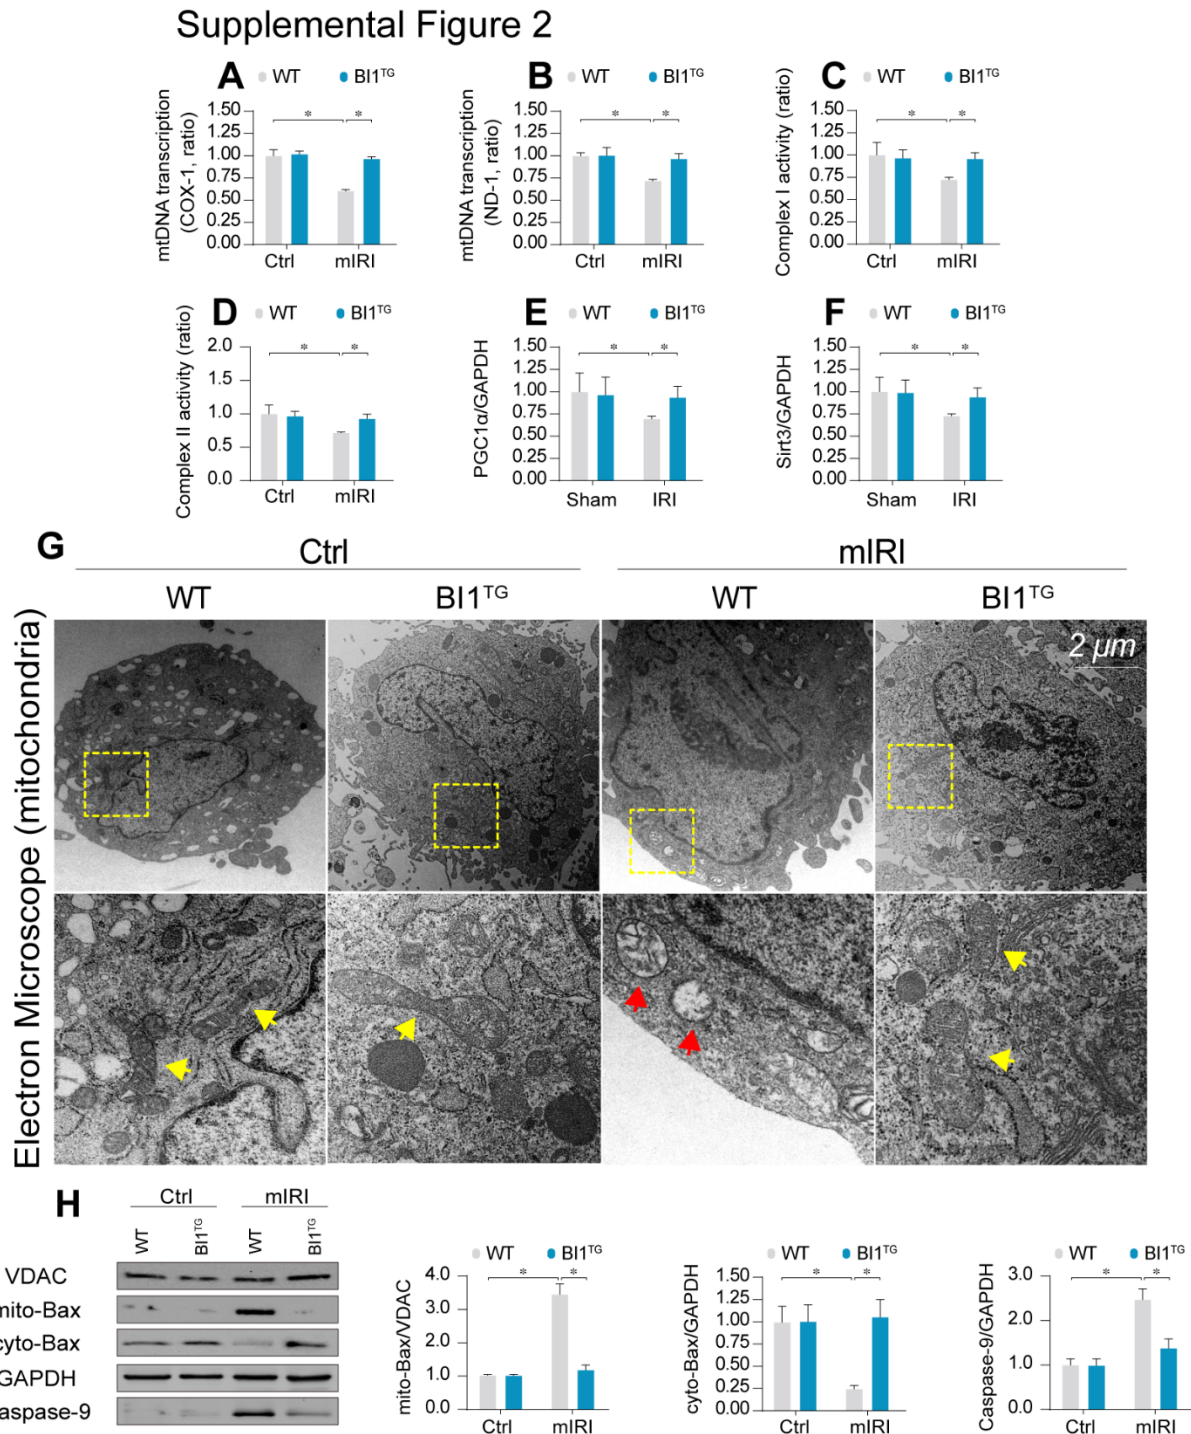

**Supplemental Figure 3: BI1 induces PHB2 localization into mitochondria.** **A.** RNA was isolated from IRI-treated kidneys and transcription of PHB2 was determined using qPCR. **B-C.** Western blotting for PHB2 in *BI1*<sup>TG</sup> and WT mice under IRI. **D.** Myc-labelled PHB2 mutants lacking N domain (Myc-PHB2ΔN) or C-terminal domain (Myc-PHB2ΔC) were infected into HK2 cells. Then, cell viability was determined via MTT assay. **E.** Caspase-9 activity was measured to evaluate the influence of PHB2 mutants on mitochondrial function. **F.** *In vitro*, siRNA against BI1 (BI1-si) and control siRNA (Ctrl-si) were transfected into primary tubule cells and then the transcription of PHB2 was determined via qPCR. Experiments were repeated for at least three times and data are shown as mean ± SEM (n = 6 mice or 3 independent cell isolations per group). \*p<0.05.

### Supplemental Figure 3

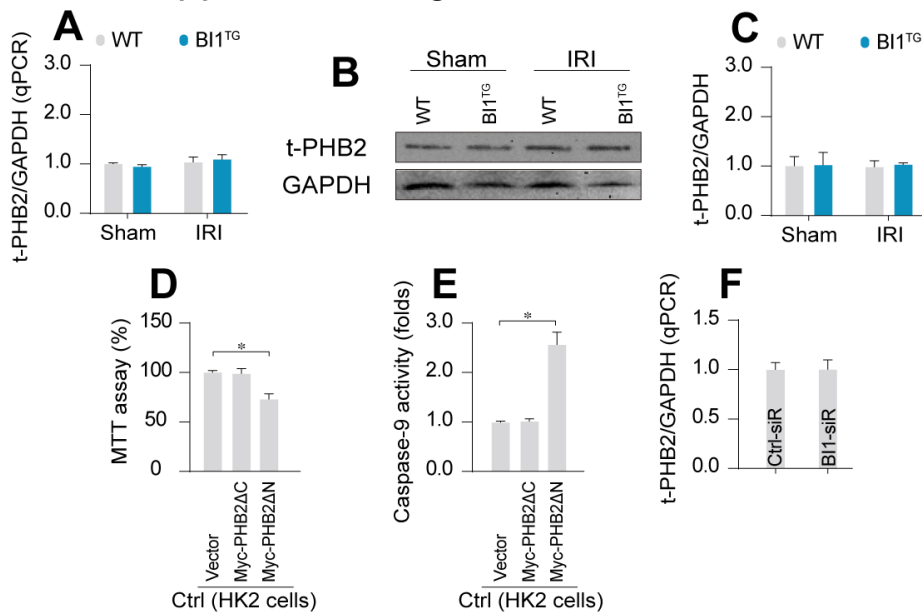

**Supplemental Figure 4: PHB2 is required for BI1-mediated mitochondrial protection.** **A.** Prior to mIRI challenge, HK2 cells were transfected with HA-BI1 and its mutants (HA-BI1 $\Delta$ C and HA-BI1 $\Delta$ N). Subsequently, mitochondrial DNA transcription was detected using qPCR. **B-C.** ELISA was used to analyze the activity of mitochondrial respiratory complex I and II. Experiments were repeated for at least three times and data are shown as mean  $\pm$  SEM (n = 3 independent cell isolations per group). \*p<0.05.

## Supplemental Figure 4

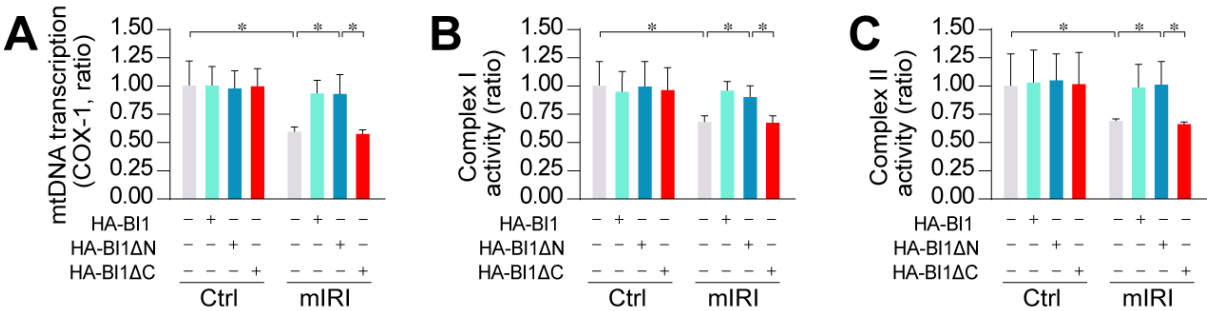

**Supplemental Figure 5 Mitochondria-localized PHB2 accounts for BI1-mediated mitochondrial protection.** **A-B.** Myc-labelled PHB2 mutants (Myc-PHB2 $\Delta$ PHB, Myc-PHB2 $\Delta$ C, Myc-PHB2 $\Delta$ N) were infected into HK2 cells. HA-BI1 or vector were constructed into HK2 cells prior to mIRI challenge. Subsequently, mitochondrial DNA copy and transcription were detected using qPCR. **C-D.** ELISA was used to analyze the activity of mitochondrial respiratory complex I and II. Experiments were repeated for at least three times and data are shown as mean  $\pm$  SEM (n = 3 independent cell isolations per group). \*p<0.05.

## Supplemental Figure 5

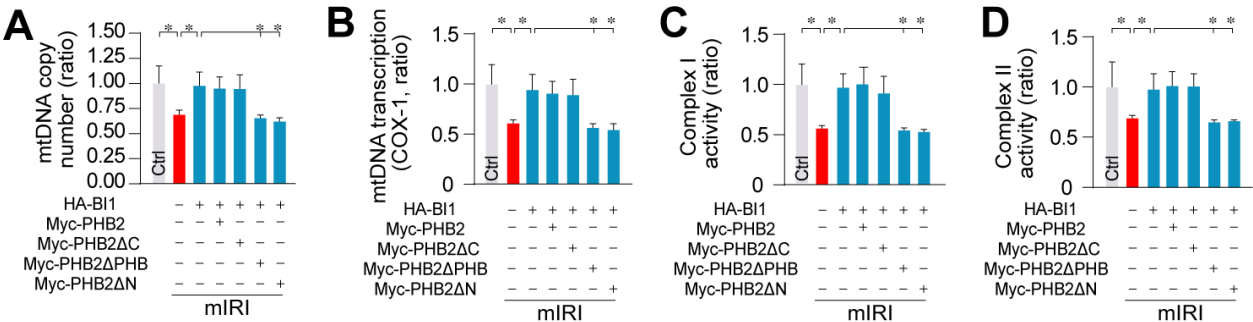

**Supplemental Figure 6: PHB2 knockdown abolishes BI1-induced renoprotection.** **A.** Primary tubule cells, isolated from WT and *BI1*<sup>TG</sup> mice, were transfected with BI-si and Ctrl-si. Cell viability was determined using MTT assay. **B.** LDH release assay was used to measure cell death. **C-D.** RNA was isolated and transcriptions of *Ccl2* and *IL-6* were determined using qPCR. Experiments were repeated for at least three times and data are shown as mean  $\pm$  SEM (n = 3 independent cell isolations per group). \*p<0.05.

## Supplemental Figure 6

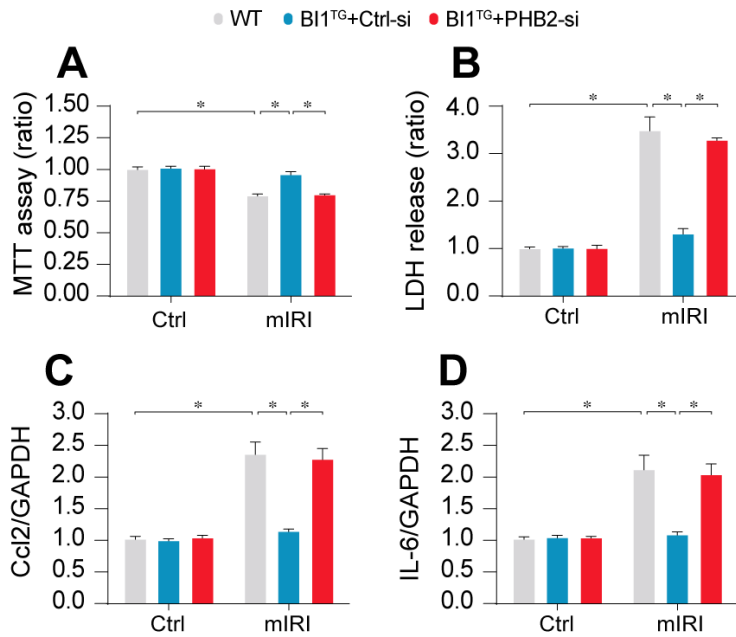

**Supplemental Table 1 Patient demographics for AKI (-) and AKI (+) patients.**

| Patients characteristics    | AKI (-) patients (n=27) | AKI (+) patients (n=28) |
|-----------------------------|-------------------------|-------------------------|
| Age (range)                 | 70 (43-87)              | 73 (45-86)              |
| Sex                         | Male (n=18)             | Male (n=21)             |
| Comorbidities               |                         |                         |
| Hypertension (n)            | 7                       | 9                       |
| Cardiovascular accident (n) | 1                       | 2                       |
| Diabetes (n)                | 3                       | 2                       |
| Clinical data               |                         |                         |
| Acute tubular necrosis (n)  | 0                       | 5                       |
| Sepsis (n)                  | 3                       | 6                       |
| Shock (n)                   | 1                       | 2                       |
| Acute coronary syndrome (n) | 1                       | 1                       |
| Hemorrhagic stroke          | 0                       | 1                       |
| Paraquat intoxication       | 0                       | 0                       |

| AKIN stage (n)                       |               |               |
|--------------------------------------|---------------|---------------|
| I                                    | 0             | 14            |
| II                                   | 0             | 9             |
| III                                  | 0             | 5             |
| APACHE II score (Average)            | 12-24 (18.7)  | 15-36 (22.1)  |
| Baseline creatinine (mg/dl; average) | 0.8-2.3 (1.2) | 0.8-3.8 (1.8) |
| Peak creatinine (mg/dl; average)     | 0.8-2.3 (1.2) | 1.9-4.1 (2.3) |

AKIN, Acute Kidney Injury Network; APACHE, Acute Physiology, Age, Chronic Health Evaluation.

**Supplemental Table 2: Antibody information in Western blot**

| Name     | Catalogue number                  | Dilution factor |
|----------|-----------------------------------|-----------------|
| IL6      | Abcam, #ab7737                    | 1:1000          |
| Sirt3    | Abcam, #ab86671                   | 1:1000          |
| VDAC     | Abcam, #ab15895                   | 1:1000          |
| GAPDH    | Abcam, #ab181602                  | 1:1000          |
| ABCB10   | Abcam, #ab74815                   | 1:1000          |
| BI1      | Abcam, #ab18852                   | 1:1000          |
| Bcl2     | Cell Signaling Technology, #3498  | 1:1000          |
| PHB2     | Cell Signaling Technology, #14085 | 1:1000          |
| Ccl2     | Cell Signaling Technology, #2029  | 1:1000          |
| Bax      | Cell Signaling Technology, #2772  | 1:1000          |
| Caspase9 | Cell Signaling Technology, #9504  | 1:1000          |

**Supplemental Table 3: Primers for qPCR**

| Gene       | Forward Prime                    | Reverse Prime                  |
|------------|----------------------------------|--------------------------------|
| Ccl2       | 5'-GTTGGCTCAGCCAGATGCA-3'        | 5'-AGCCTACTCATTGGGATCATCTTG-3' |
| IL6        | 5'-TGGCTAAGGACCAAGACCATCCAA -3'  | 5'-AACGCACTAGGTTTGCCGAGTAGA-3' |
| PHB2       | 5'-CCATTGTTAATGAGGTGCTCAA -3'    | 5'-CTTCGGATCAACAGGGACA-3'      |
| PGC1a      | 5'-TCACACCCCAAGCCCTTTT-3'        | 5'-GTGGGCTTCAACCAGCTTTG-3'     |
| Sirt3      | 5'-GGTGCCTAGTGAGAGTGAGTCCCC-3'   | 5'-TCGGGGCTGAAGAGGGAGAAGTC-3'  |
| GAPDH      | 5'-ACGGCAAATTCAACGGCACAGTCA-3'   | 5'-TGGGGGCATCGGCAGAAGG-3'      |
| Kim1       | 5'-ACATATCGTGGAATCACAACGAC-3'    | 5'-ACTGCTCTTCTGATAGGTGACA-3'   |
| ND-1       | 5'-ATGGTCAGTCTGTTCATGGTGGAAAC-3' | 5'-GCATAGCACAAGCAGCGACAAC-3'   |
| COX-1      | 5'-GAAGAGACAGTGTTTCATGTGGTGT-3'  | 5'-TCCTGGGCCTTTCAGGAATA-3'     |
| Complex-IV | 5'-CAGGATTCTTCTGAGCGTTCTATCA-3'  | 5'-AATTCCTGTTGGAGGTGAGCA-3'    |
